# Supplementary material for: Synthesis, characterization and visible-light photocatalytic activity of Bi24Al2O39 mesoporous hollow spheres
Source: Royal Society of Chemistry journal article supplement (doi:10.1039/c3ra41054d), 2013-01-01
Supplement: c3ra41054d.pdf [file c3ra41054d.pdf]

## Electronic Supplementary Information

### Synthesis, characterization and visible-light photocatalytic activity of

#### **Bi<sub>24</sub>Al<sub>2</sub>O<sub>39</sub> mesoporous hollow spheres**

**Zhen Wan<sup>a</sup>, Gaoke Zhang<sup>\*a</sup>, Junting Wang<sup>a</sup>, Yalei Zhang<sup>\*b</sup>**

*a. School of Resources and Environmental Engineering, Wuhan University of  
Technology, Wuhan, 430070, China*

*b. State Key Laboratory of Pollution Control and Resource Reuse, College of  
Environmental Science and Engineering, Tongji University, Shanghai 200092, China*

\*Corresponding author. Tel: 86-27-87651816; fax: 86-27-87887445.

E-mail: gkzhang@whut.edu.cn; zhangyalei06@126.com.

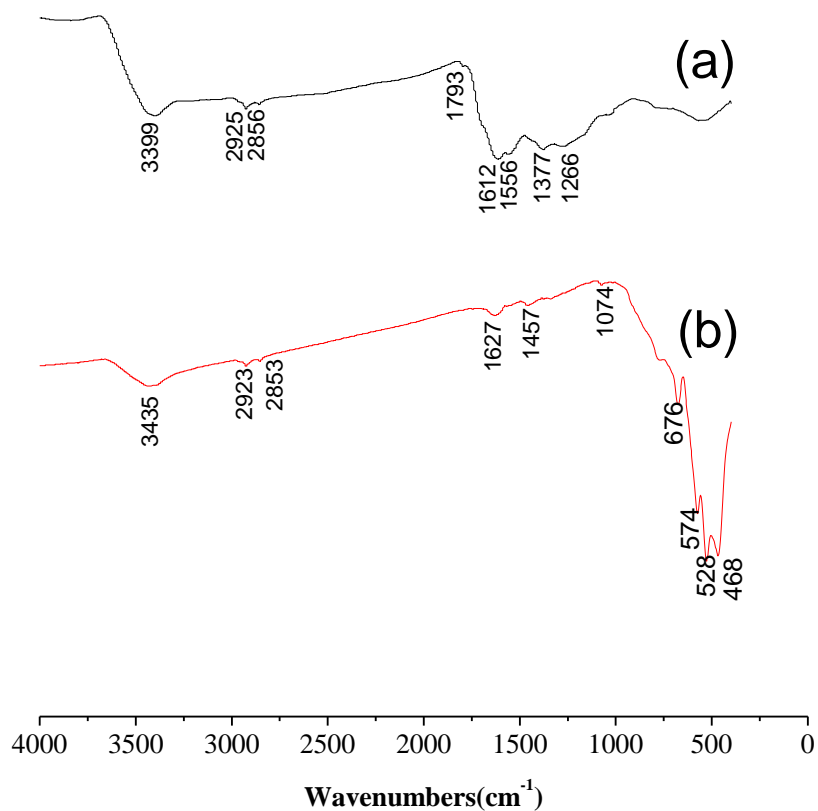

**Fig. S1** FR-IR spectra of (a) the BAO-20, (b) the BAO-20-550.

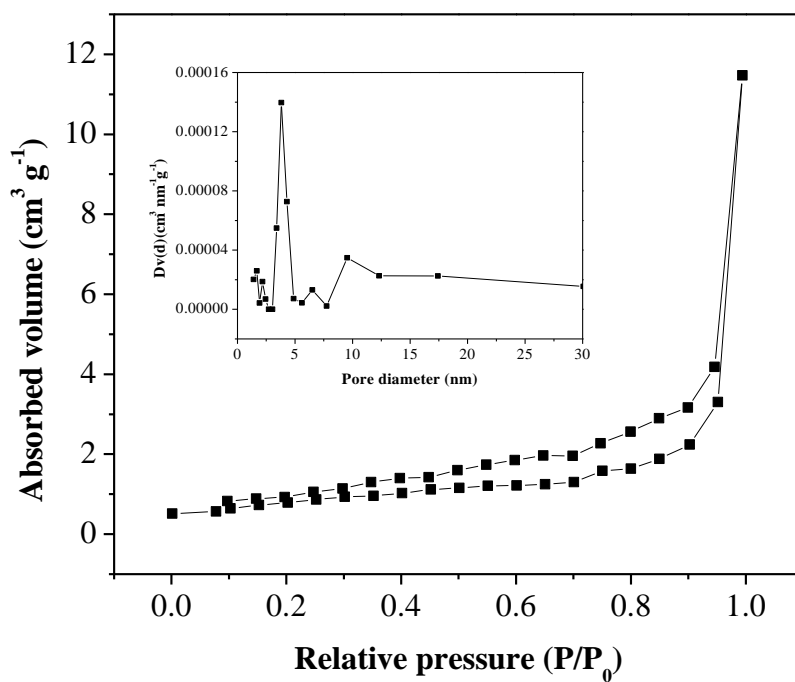

**Fig. S2**  $\text{N}_2$  adsorption-desorption isotherm of the BAO-20-550 catalyst. The insert is pore size distribution of the BAO-20-550 catalyst.

**Table S1** BET surface area, pore volume and average pore size of the samples

| Samples                                            | BAO-20-550 | BAO-20-650 | BAO-20-750 | BAO-SSR        |
|----------------------------------------------------|------------|------------|------------|----------------|
| $S_{\text{BET}}$ ( $\text{m}^2/\text{g}$ )         | 2.99       | 2.41       | 2.08       | 1.50           |
| $D_{\text{p}}$ (nm)                                | 23.78      | 16.09      | 12.99      | / <sup>a</sup> |
| $V_{\text{p}}$ ( $10^{-3} \text{ cm}^3/\text{g}$ ) | 17.79      | 9.71       | 6.74       | / <sup>a</sup> |

<sup>a</sup> Too small to be detected.

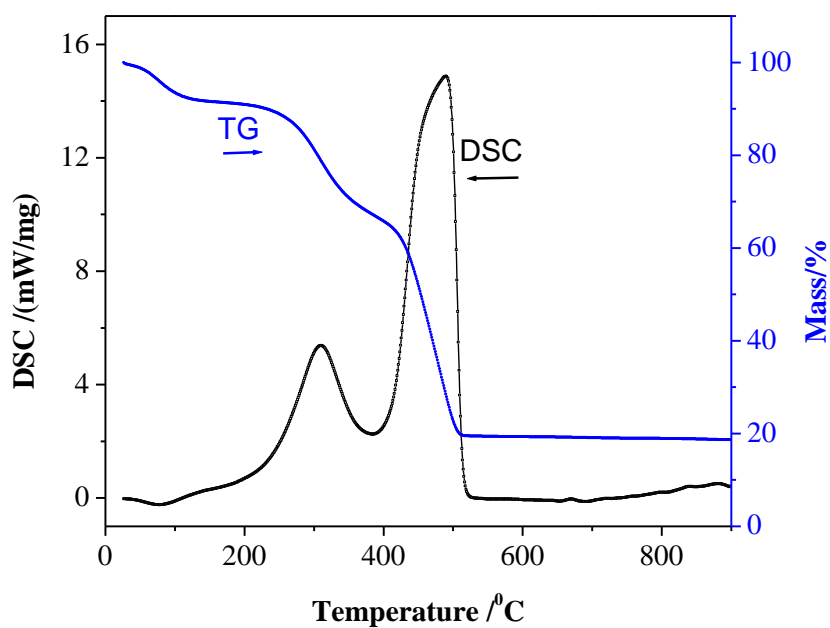

**Fig. S3** TG-DSC curves of the uncalcinated sample.

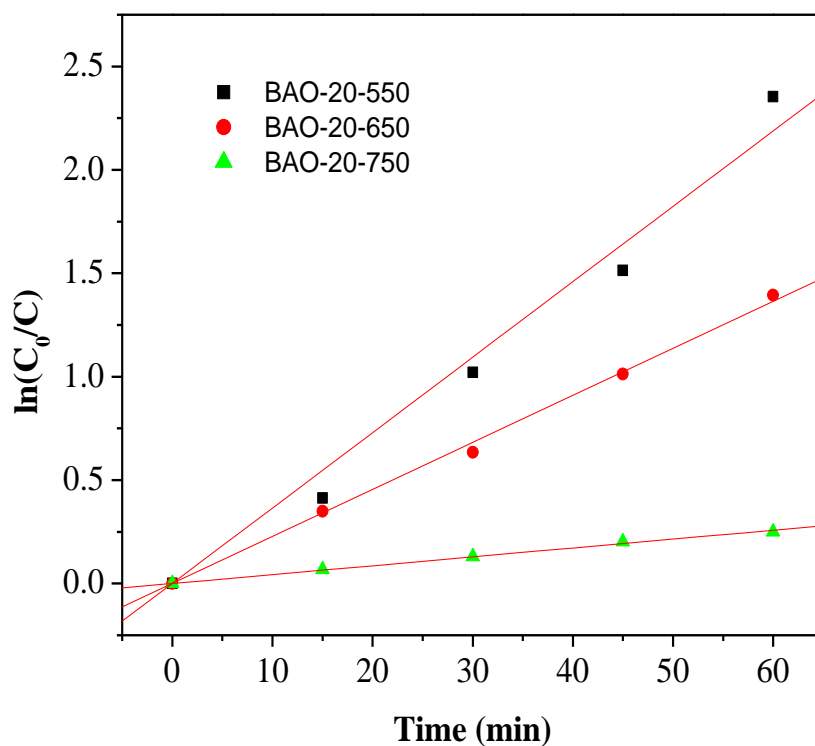

**Fig. S4** Kinetic studies for the degradation of ARG over the  $\text{Bi}_{24}\text{Al}_2\text{O}_{39}$  mesoporous hollow spheres obtained at different calcination temperature.

**Table S2** Comparison of the kinetic parameters for the catalysts

| Sample     | Fitted equation        | R      | Rate constant<br>k |
|------------|------------------------|--------|--------------------|
| BAO-20-550 | $\ln(C_0/C) = 0.0365t$ | 0.9927 | 0.0365             |
| BAO-20-650 | $\ln(C_0/C) = 0.0227t$ | 0.9987 | 0.0227             |
| BAO-20-750 | $\ln(C_0/C) = 0.0043t$ | 0.9984 | 0.0043             |

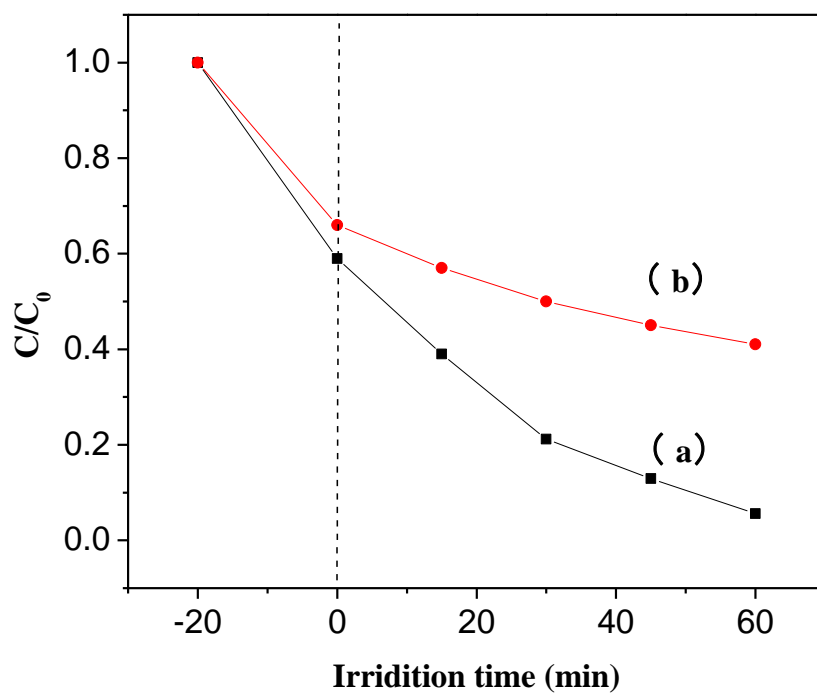

**Fig. S5** Time-dependent photocatalytic degradation efficiency of ARG by (a) the BAO-20-550, (b) the crushed BAO-20-550.

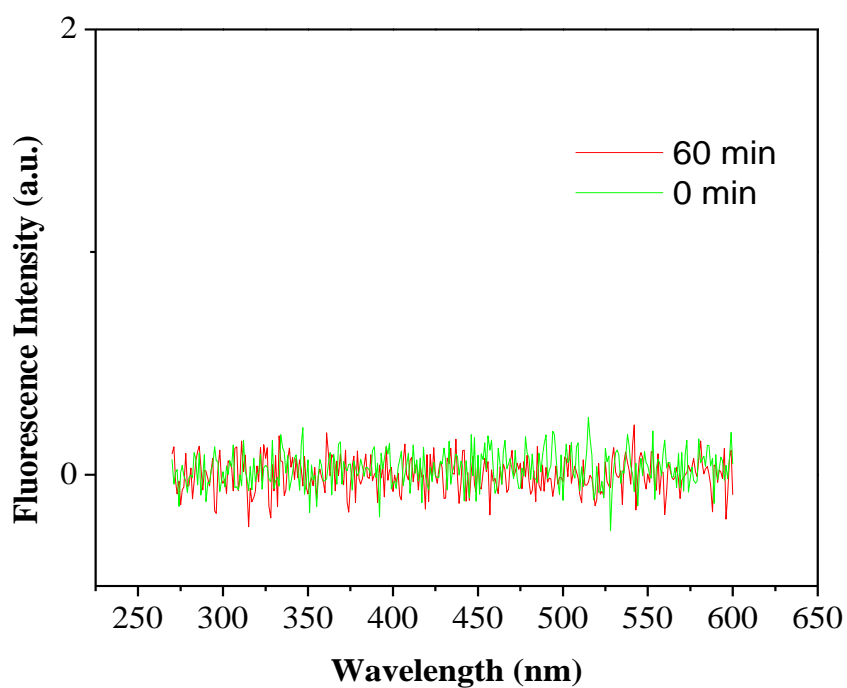

**Fig. S6**  $\cdot\text{OH}$  trapping photoluminescence spectra of the  $\text{Bi}_{24}\text{Al}_2\text{O}_{39}$ -TA suspension under visible-light irradiation.
